# Supplementary material
Source: bioRxiv or medRxiv preprint supplement (https://medrxiv.org/content/medrxiv/early/2023/09/14/2023.09.07.23295190/DC2/embed/media-2.pdf)

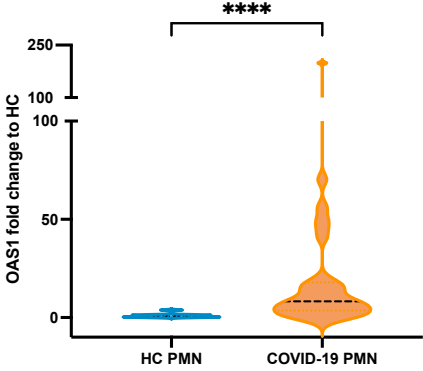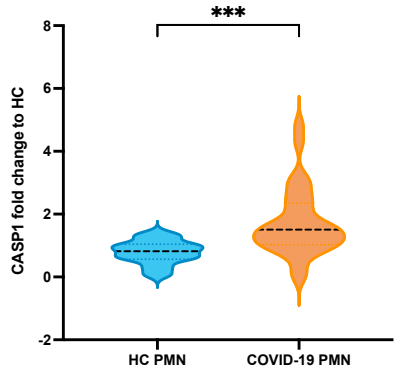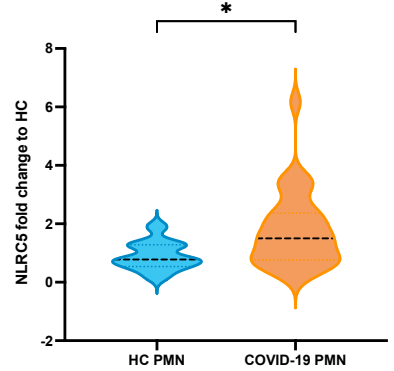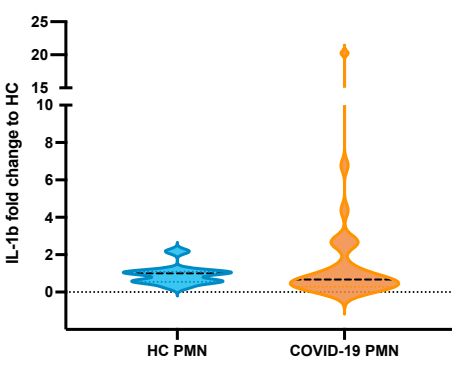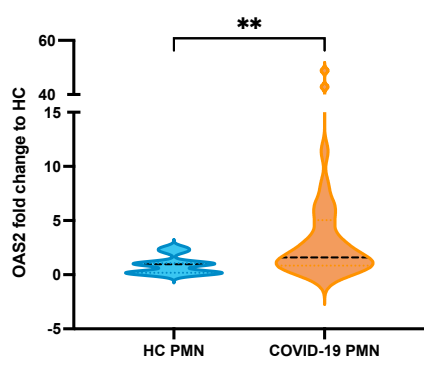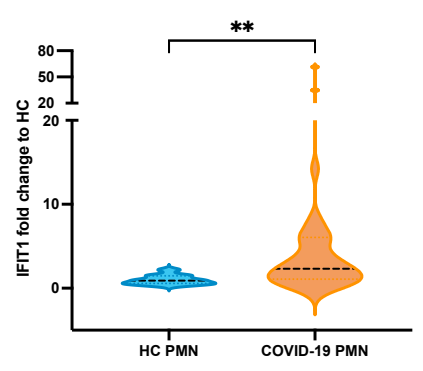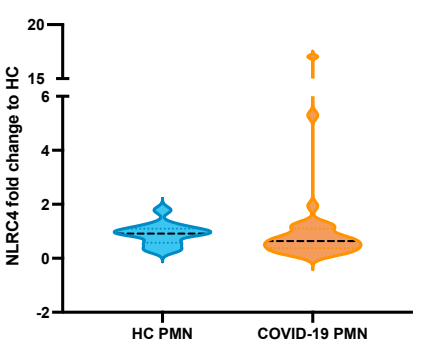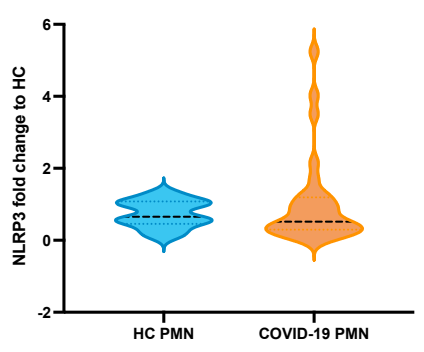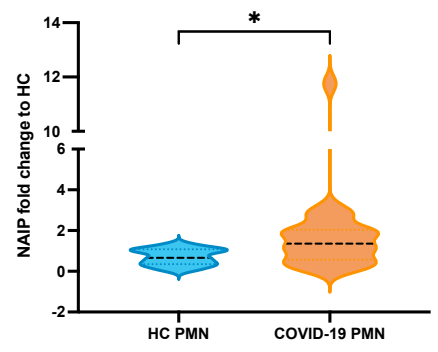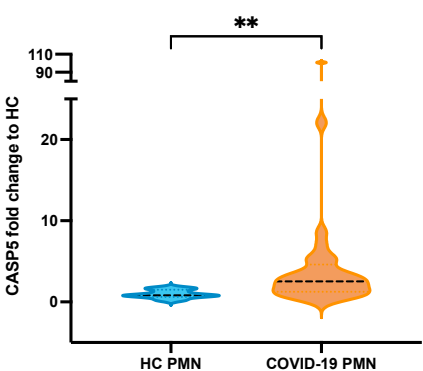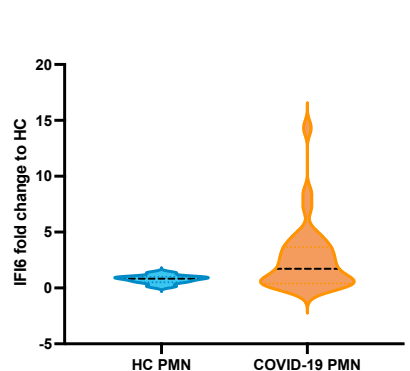

Supplement: Supplementary file [file media-2.pdf]
